# Supplementary material for: Computational screening of effective g-C3N4 based single atom electrocatalysts for the selective conversion of CO2
Source: Royal Society of Chemistry journal article supplement (doi:10.1039/d3nr00286a), 2023-01-01
Supplement: d3nr00286a1.pdf [file d3nr00286a1.pdf]

## Computational screening of effective g-C<sub>3</sub>N<sub>4</sub> based single atom electrocatalysts for the selective conversion of CO<sub>2</sub>

Huiwen Zhu<sup>1,2,3</sup>, Shuai Liu<sup>4</sup>, Jiahui Yu<sup>5</sup>, Quhan Chen<sup>1,2,3</sup>, Xinyi Mao<sup>6</sup>, Tao Wu<sup>\*1,2,3</sup>

1. *Municipal Key Laboratory of Clean Energy Technologies of Ningbo, The University of Nottingham Ningbo China, Ningbo 315100, China*

2. *Department of Chemical and Environmental Engineering, The University of Nottingham Ningbo China, Ningbo 315100, China*

3. *Key Laboratory of Carbonaceous Wastes Processing and Process Intensification of Zhejiang Province, The University of Nottingham Ningbo China, Ningbo 315100, China*

4. *School of Mechatronics and Energy Engineering, Ningbo Tech University, 315100, Ningbo, China*

5. *Medical Science and Technology Innovation Centre, Shandong First Medical University & Shandong Academy of Medical Sciences, Jinan 250117, China.*

6. *College of Energy and Mechanical Engineering, Shanghai University of Electric power, Shanghai 200090, China*

\*Corresponding author: Tao Wu, [Tao.Wu@nottingham.edu.cn](mailto:Tao.Wu@nottingham.edu.cn)

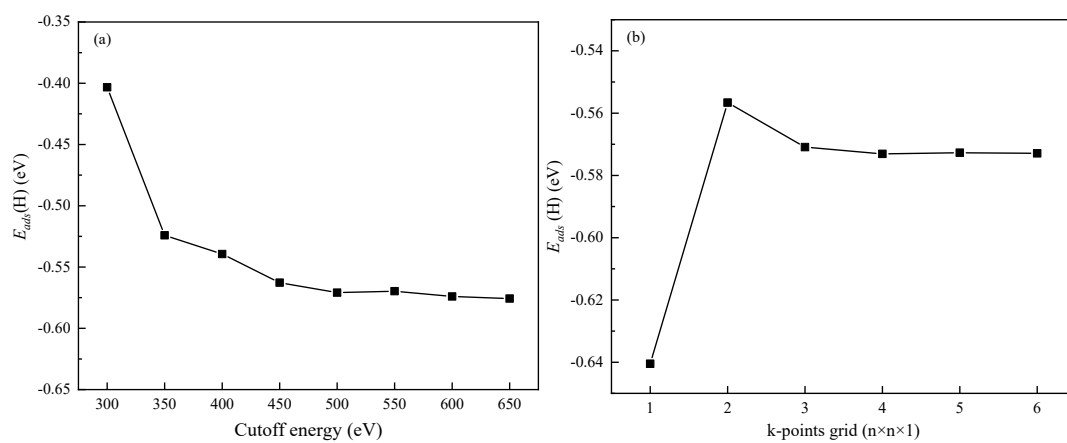

**Figure S1.** The convergence of H adsorption energy with respect to the cut-off energy (a) and k-point grids (b) used in the calculations.

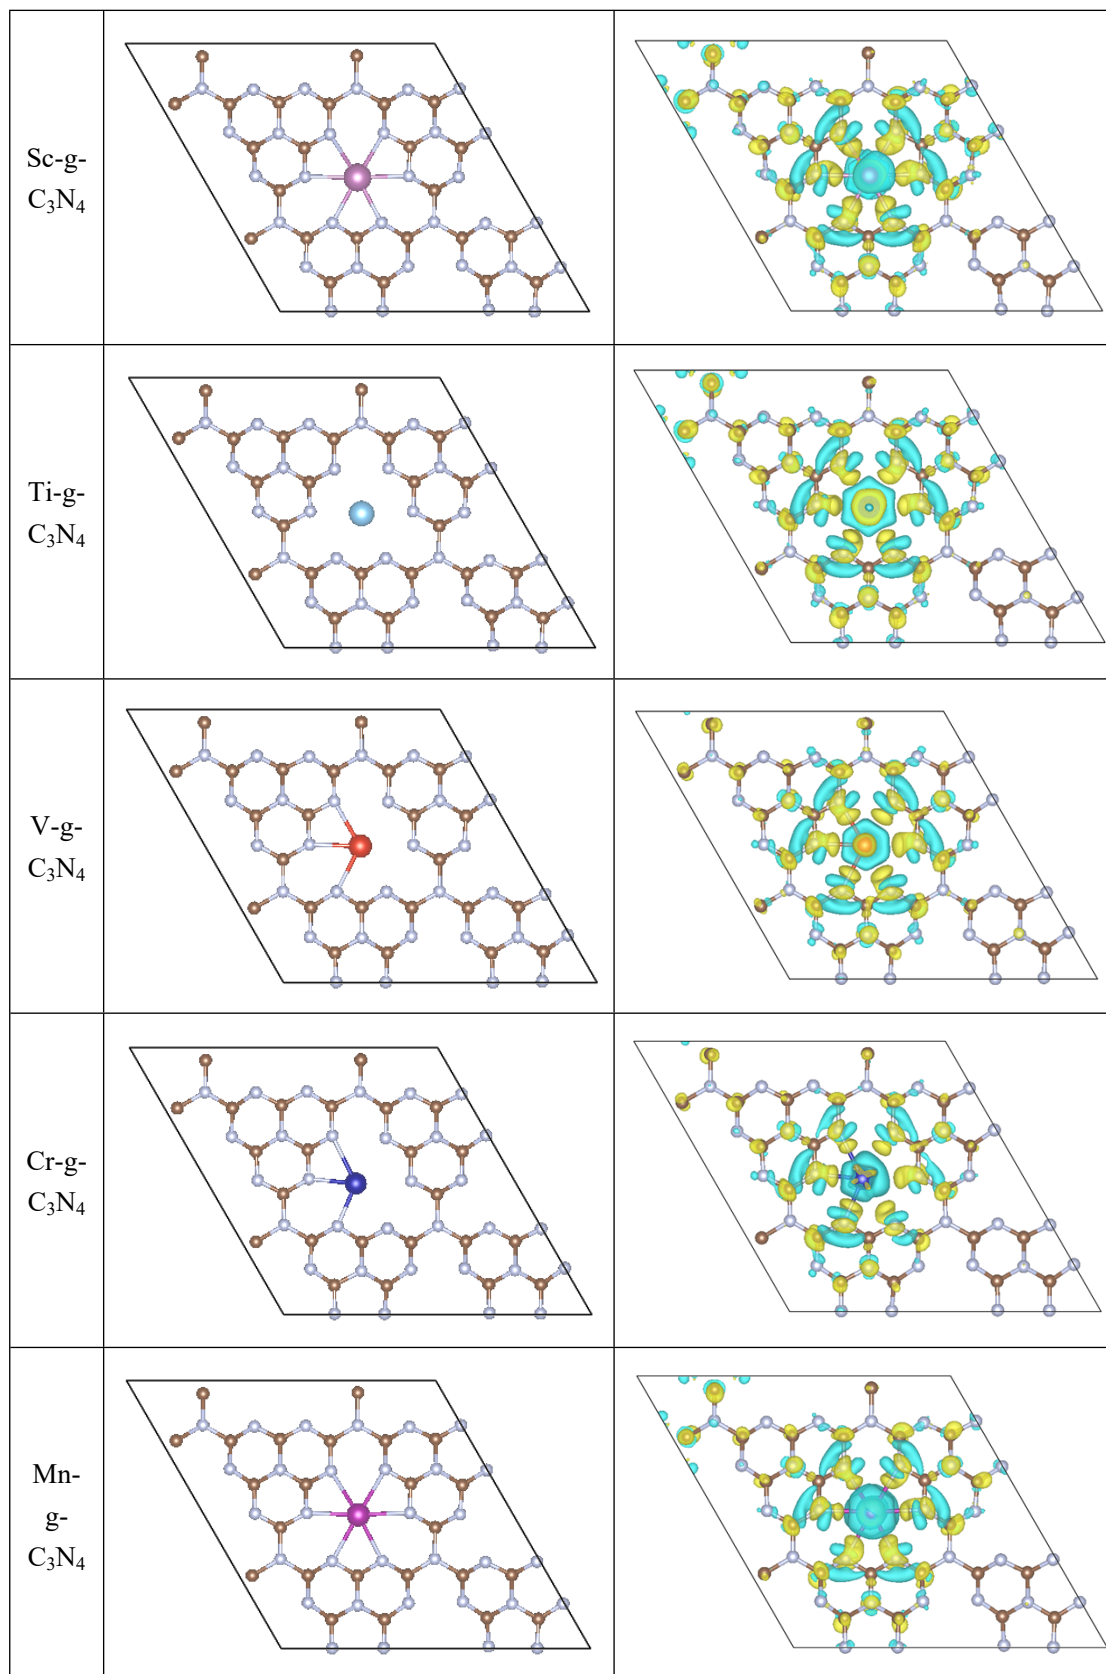

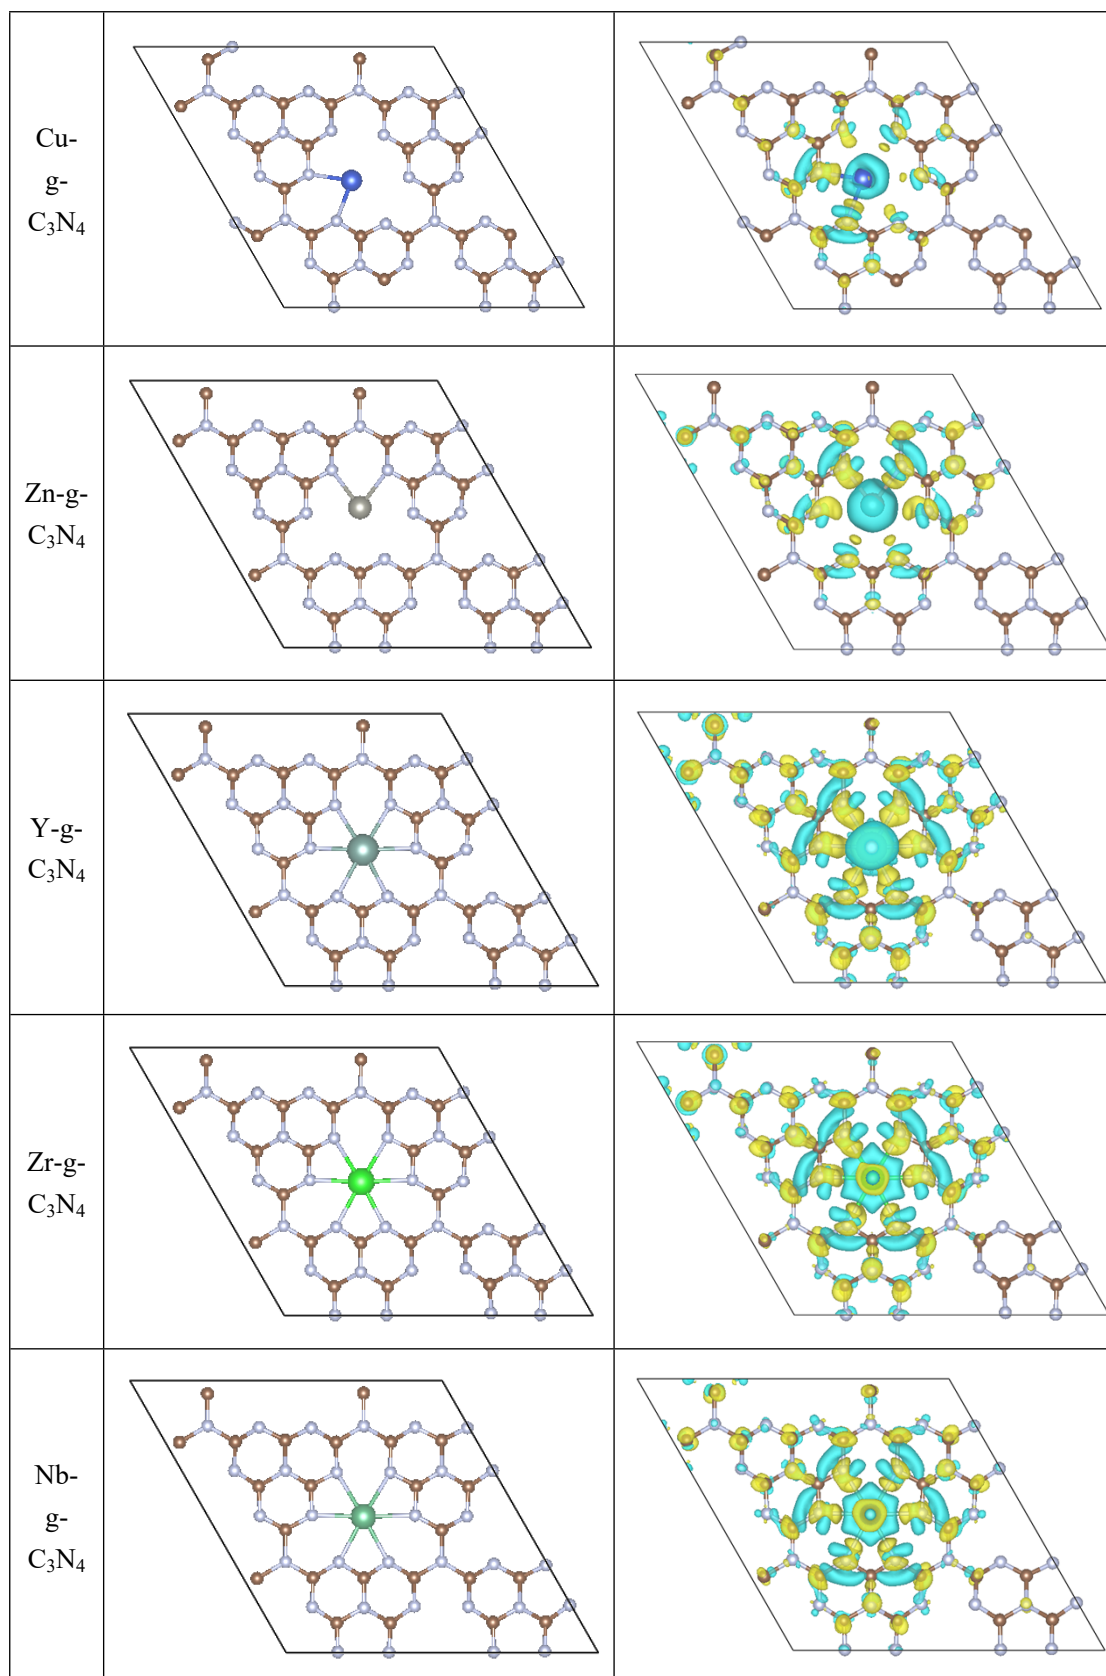

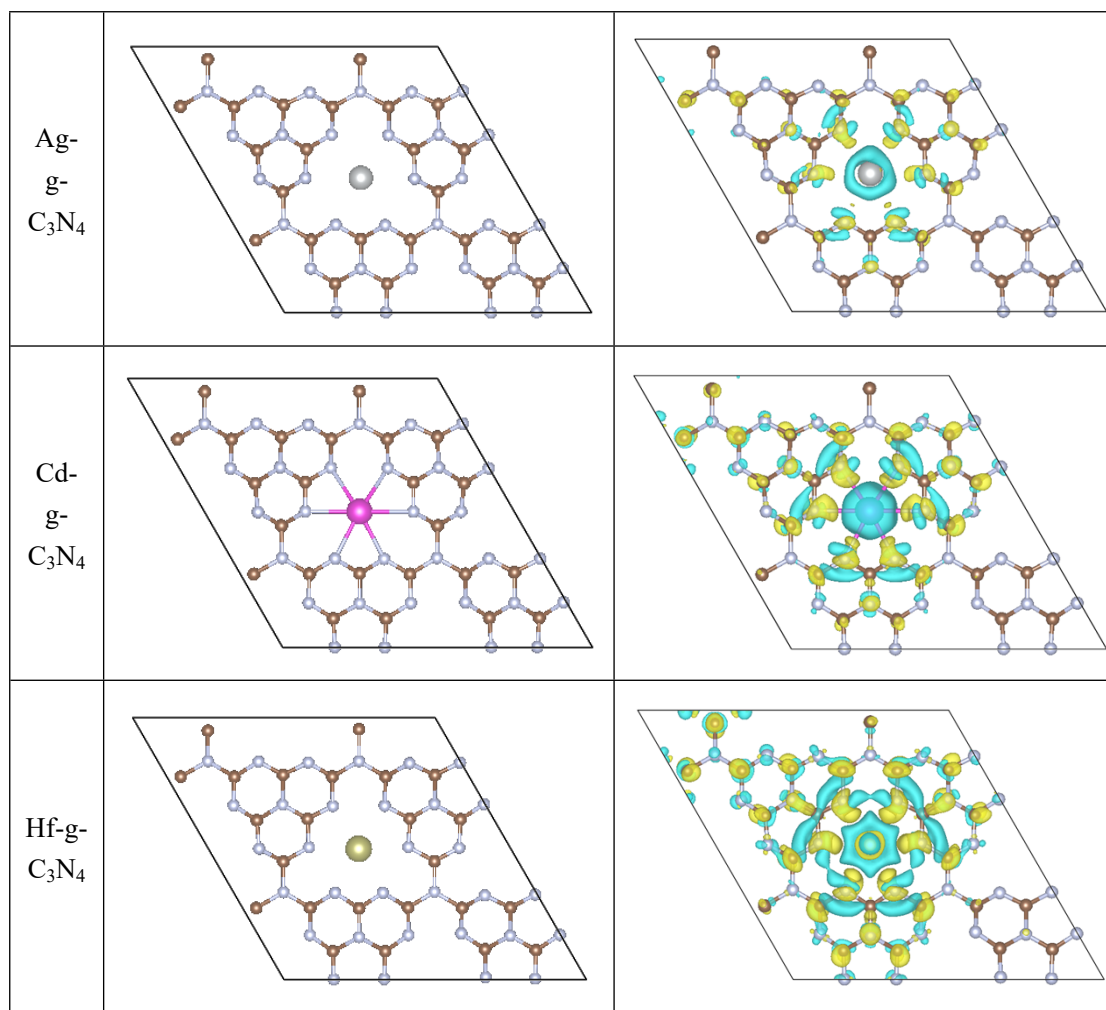

**Figure S2.** Stable configurations of TM-g-C<sub>3</sub>N<sub>4</sub> (TM= Sc, Ti, V, Cr, Mn, Cu, Zn, Y, Zr, Nb, Ag, Cd and Hf) and charge density difference between TM atom and g-C<sub>3</sub>N<sub>4</sub> (isosurface value is set to be 0.003 e/Å<sup>3</sup>, the yellow and cyan indicate the electron accumulation and electron depletion respectively).

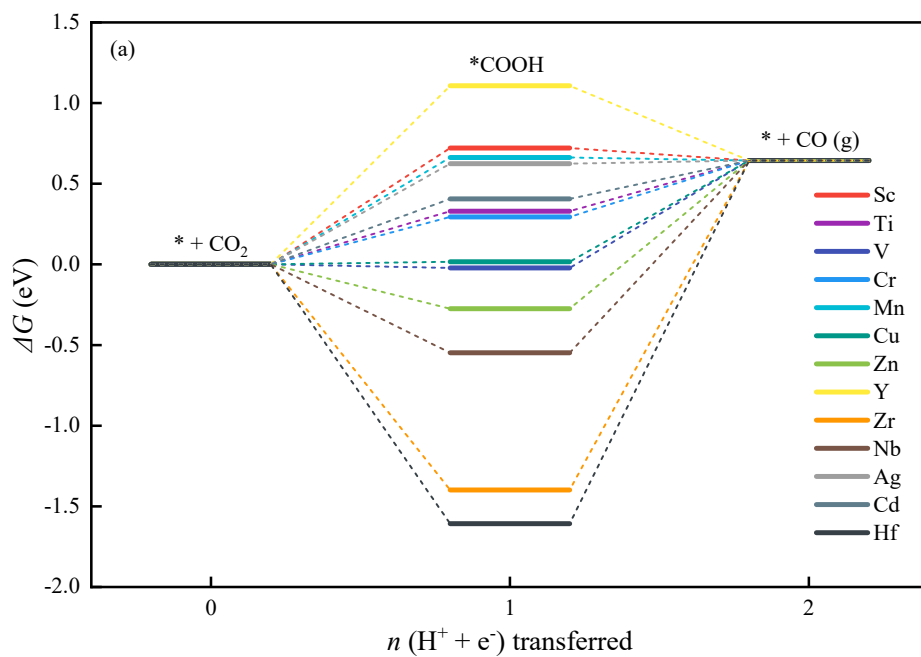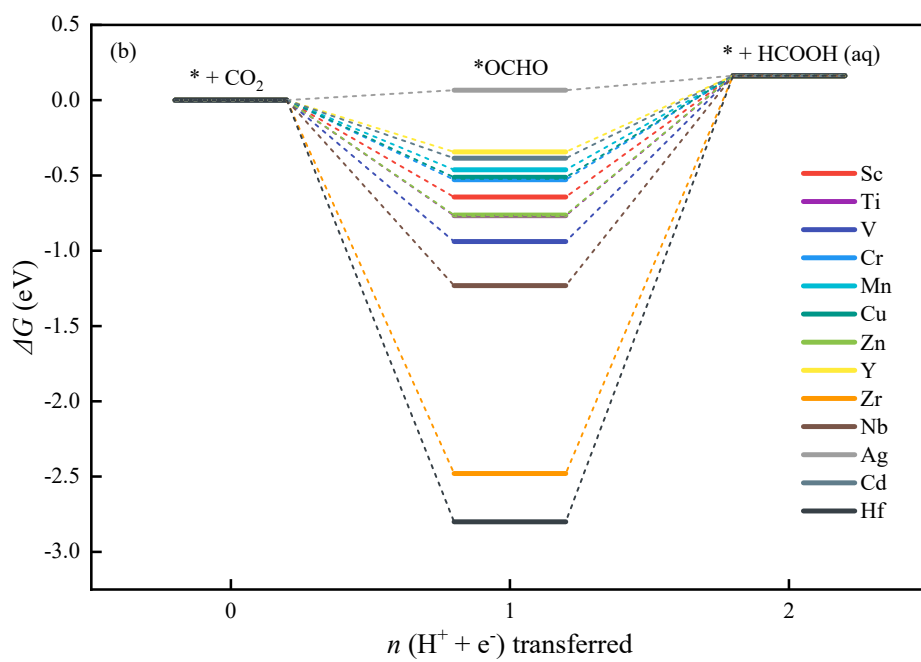

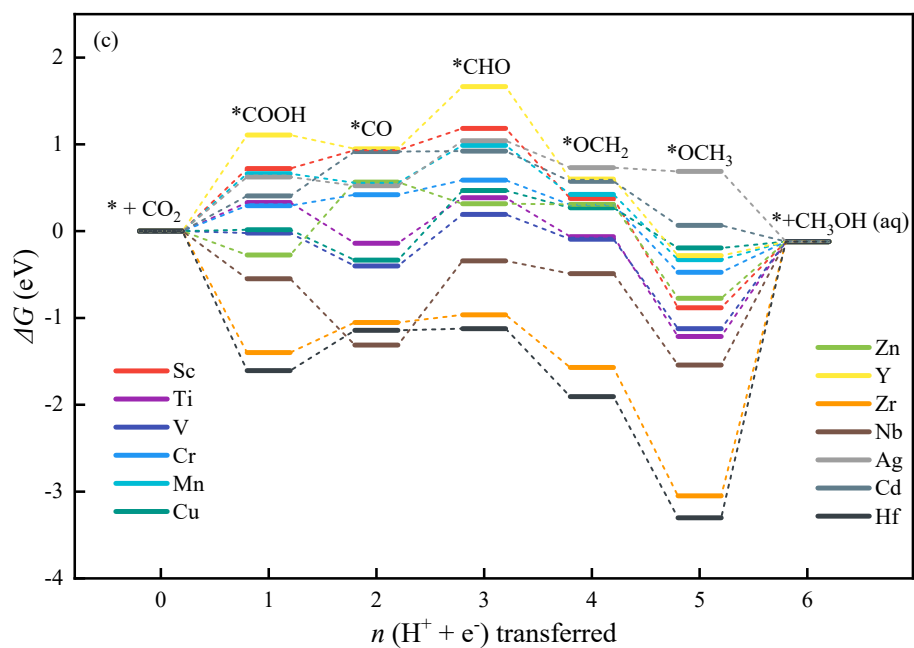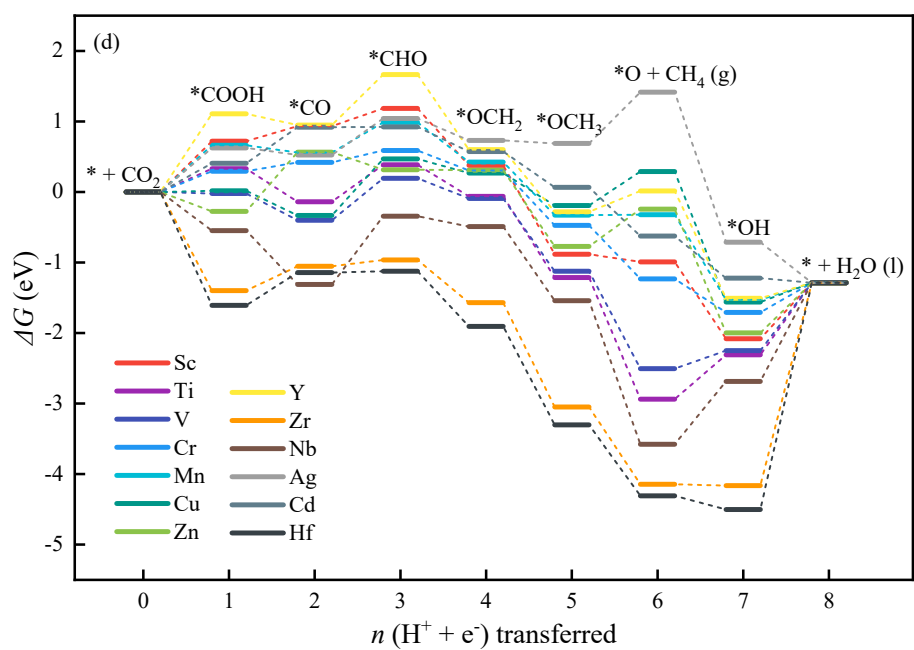

**Figure S3.** Gibbs free energy diagram for  $\text{CO}$  (a),  $\text{HCOOH}$  (b),  $\text{CH}_3\text{OH}$  (c) and  $\text{CH}_4$  (d) along the most favourable pathway

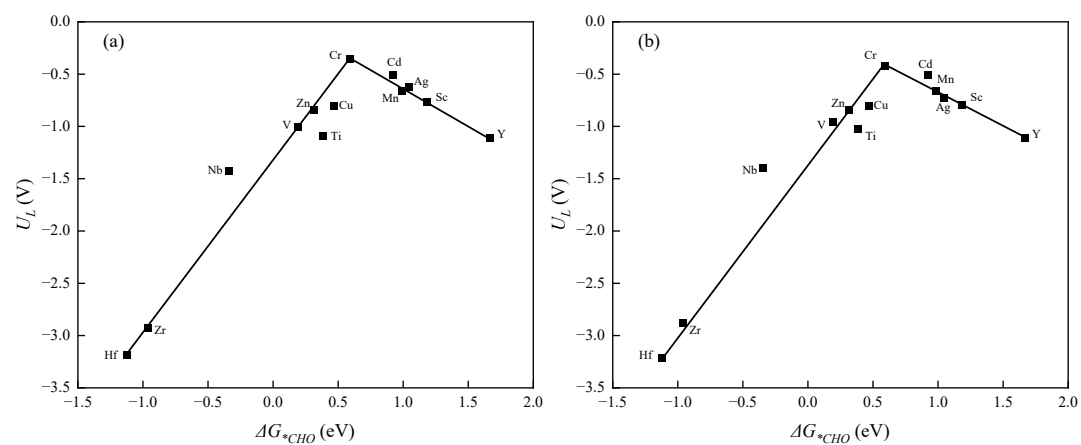

**Figure S4.** Volcano plots of  $U_L$  for  $\text{CH}_3\text{OH}$  (a) and  $\text{CH}_4$  (b) as a function of  $\Delta G^*_{CHO}$



**Table S1.** Binding energies ( $E_{\text{bind}}$ ) and cohesive energies ( $E_{\text{coh}}$ ) (in eV) of TM atoms on g-C<sub>3</sub>N<sub>4</sub>, as well as the crystal phase of TMs in their most stable bulk structures.

| TM | $E_{\text{bind}}$ | $E_{\text{coh}}$ | $E_{\text{bind}} - E_{\text{coh}}$ | Crystal phase |
|----|-------------------|------------------|------------------------------------|---------------|
| Sc | -8.214            | -4.512           | -3.702                             | hexagonal     |
| Ti | -7.866            | -5.911           | -1.955                             | hexagonal     |
| V  | -6.552            | -5.947           | -0.605                             | cubic         |
| Cr | -4.816            | -4.462           | -0.354                             | cubic         |
| Mn | -4.960            | -4.158           | -0.803                             | cubic         |
| Fe | -4.478            | -5.256           | 0.778                              | cubic         |
| Co | -5.236            | -5.858           | 0.622                              | hexagonal     |
| Ni | -5.152            | -5.327           | 0.175                              | cubic         |
| Cu | -4.027            | -3.986           | -0.041                             | cubic         |
| Zn | -1.859            | -1.434           | -0.425                             | hexagonal     |
| Y  | -8.984            | -4.558           | -4.426                             | hexagonal     |
| Zr | -9.319            | -6.690           | -2.630                             | hexagonal     |
| Nb | -8.155            | -7.590           | -0.565                             | cubic         |
| Mo | -5.588            | -6.921           | 1.333                              | cubic         |
| Tc | -5.618            | -7.647           | 2.029                              | hexagonal     |
| Ru | -6.664            | -8.577           | 1.913                              | hexagonal     |
| Rh | -5.555            | -6.572           | 1.018                              | cubic         |
| Pd | -3.610            | -4.297           | 0.687                              | cubic         |
| Ag | -3.294            | -2.983           | -0.312                             | cubic         |
| Cd | -1.803            | -1.049           | -0.754                             | hexagonal     |
| Hf | -9.109            | -6.818           | -2.290                             | hexagonal     |
| Ta | -8.759            | -8.908           | 0.149                              | cubic         |
| W  | -5.621            | -8.988           | 3.367                              | cubic         |
| Re | -4.851            | -8.381           | 3.531                              | hexagonal     |
| Os | -5.543            | -8.945           | 3.402                              | hexagonal     |
| Ir | -5.959            | -8.333           | 2.374                              | cubic         |
| Pt | -4.321            | -6.315           | 1.994                              | cubic         |
| Au | -2.677            | -3.670           | 0.993                              | cubic         |

**Table S2.** Bader charge transfer ( $|e|$ ) from TM to g-C<sub>3</sub>N<sub>4</sub> and magnetic moments of TMs

| TM | Bader charge transfer $ e $ | Magnetic Moment ( $\mu\text{B}$ ) |
|----|-----------------------------|-----------------------------------|
| Sc | 2.239                       | 0.011                             |
| Ti | 1.957                       | 1.181                             |
| V  | 1.398                       | 2.520                             |
| Cr | 1.405                       | 3.591                             |
| Mn | 1.553                       | 4.556                             |
| Cu | 0.767                       | 0.010                             |
| Zn | 1.298                       | 0.000                             |
| Y  | 2.431                       | 0.004                             |
| Zr | 1.873                       | 0.719                             |
| Nb | 1.563                       | 1.679                             |
| Ag | 0.664                       | 0.006                             |
| Cd | 1.351                       | -0.010                            |
| Hf | 1.891                       | 0.649                             |

**Table S3.** Corresponding thermodynamic energy corrections (in eV) for molecules

| Molecules*              | ZPE   | -TS    | $\int c_p dT$ |
|-------------------------|-------|--------|---------------|
| H <sub>2</sub> (g)      | 0.268 | -0.403 | 0.090         |
| CO (g)                  | 0.132 | -0.611 | 0.090         |
| CO <sub>2</sub> (g)     | 0.307 | -0.662 | 0.098         |
| H <sub>2</sub> O (l)    | 0.568 | -0.670 | 0.103         |
| HCOOH (aq)              | 0.887 | -1.048 | 0.113         |
| CH <sub>3</sub> OH (aq) | 1.342 | -0.865 | 0.130         |
| CH <sub>4</sub> (g)     | 1.185 | -0.576 | 0.104         |

\*: The gaseous species, CO<sub>2</sub>, CO, CH<sub>4</sub> and H<sub>2</sub>, were calculated at 101325 Pa, while H<sub>2</sub>O, HCOOH and CH<sub>3</sub>OH were treated with pressure correction at a fugacity of 3534 Pa, 2 Pa and 6080 Pa.

**Table S4.** Free energy corrections (in eV) for intermediates

| Intermediate | TM | ZPE   | -TS    | $\int c_p dT$ |
|--------------|----|-------|--------|---------------|
| <b>*COOH</b> | Sc | 0.612 | -0.115 | 0.065         |
|              | Ti | 0.608 | -0.217 | 0.110         |
|              | V  | 0.608 | -0.160 | 0.086         |
|              | Cr | 0.603 | -0.138 | 0.068         |
|              | Mn | 0.610 | -0.212 | 0.108         |
|              | Cu | 0.621 | -0.202 | 0.103         |
|              | Zn | 0.633 | -0.194 | 0.098         |
|              | Y  | 0.614 | -0.174 | 0.088         |
|              | Zr | 0.636 | -0.190 | 0.097         |
|              | Nb | 0.605 | -0.228 | 0.111         |
|              | Ag | 0.616 | -0.147 | 0.082         |
|              | Cd | 0.615 | -0.231 | 0.111         |
|              | Hf | 0.634 | -0.126 | 0.074         |

  

| Intermediate | TM | ZPE   | -TS    | $\int c_p dT$ |
|--------------|----|-------|--------|---------------|
| <b>*OCHO</b> | Sc | 0.603 | -0.176 | 0.087         |
|              | Ti | 0.603 | -0.158 | 0.083         |
|              | V  | 0.624 | -0.183 | 0.096         |
|              | Cr | 0.620 | -0.199 | 0.100         |
|              | Mn | 0.609 | -0.223 | 0.107         |
|              | Cu | 0.615 | -0.152 | 0.079         |
|              | Zn | 0.613 | -0.170 | 0.083         |
|              | Y  | 0.606 | -0.114 | 0.062         |
|              | Zr | 0.607 | -0.158 | 0.082         |
|              | Nb | 0.611 | -0.148 | 0.079         |
|              | Ag | 0.606 | -0.162 | 0.083         |
|              | Cd | 0.613 | -0.216 | 0.107         |
|              | Hf | 0.610 | -0.157 | 0.082         |

| Intermediate | TM | ZPE   | -TS    | $\int c_p dT$ |
|--------------|----|-------|--------|---------------|
| <b>*CO</b>   | Sc | 0.199 | -0.115 | 0.067         |
|              | Ti | 0.185 | -0.106 | 0.053         |
|              | V  | 0.210 | -0.115 | 0.061         |
|              | Cr | 0.204 | -0.115 | 0.064         |
|              | Mn | 0.174 | -0.119 | 0.060         |
|              | Cu | 0.223 | -0.103 | 0.059         |
|              | Zn | 0.167 | -0.141 | 0.067         |
|              | Y  | 0.170 | -0.131 | 0.063         |
|              | Zr | 0.184 | -0.096 | 0.051         |
|              | Nb | 0.202 | -0.135 | 0.065         |
|              | Ag | 0.190 | -0.153 | 0.079         |
|              | Cd | 0.186 | -0.160 | 0.082         |
|              | Hf | 0.188 | -0.088 | 0.049         |

| Intermediate | TM | ZPE   | -TS    | $\int c_p dT$ |
|--------------|----|-------|--------|---------------|
| <b>*CHO</b>  | Sc | 0.469 | -0.131 | 0.072         |
|              | Ti | 0.476 | -0.117 | 0.067         |
|              | V  | 0.446 | -0.168 | 0.083         |
|              | Cr | 0.437 | -0.182 | 0.087         |
|              | Mn | 0.457 | -0.134 | 0.075         |
|              | Cu | 0.440 | -0.123 | 0.063         |
|              | Zn | 0.466 | -0.106 | 0.057         |
|              | Y  | 0.448 | -0.127 | 0.062         |
|              | Zr | 0.467 | -0.139 | 0.073         |
|              | Nb | 0.441 | -0.109 | 0.060         |
|              | Ag | 0.435 | -0.183 | 0.087         |
|              | Cd | 0.446 | -0.142 | 0.066         |
|              | Hf | 0.466 | -0.133 | 0.072         |

| Intermediate            | TM | ZPE   | -TS    | $\int C_p dT$ |
|-------------------------|----|-------|--------|---------------|
| <b>*OCH<sub>2</sub></b> | Sc | 0.711 | -0.173 | 0.087         |
|                         | Ti | 0.741 | -0.199 | 0.099         |
|                         | V  | 0.753 | -0.190 | 0.096         |
|                         | Cr | 0.721 | -0.144 | 0.070         |
|                         | Mn | 0.724 | -0.136 | 0.068         |
|                         | Cu | 0.771 | -0.191 | 0.094         |
|                         | Zn | 0.749 | -0.203 | 0.100         |
|                         | Y  | 0.730 | -0.196 | 0.098         |
|                         | Zr | 0.719 | -0.161 | 0.084         |
|                         | Nb | 0.710 | -0.163 | 0.085         |
|                         | Ag | 0.726 | -0.247 | 0.105         |
|                         | Cd | 0.738 | -0.181 | 0.087         |
|                         | Hf | 0.718 | -0.229 | 0.110         |

| Intermediate            | TM | ZPE   | -TS    | $\int C_p dT$ |
|-------------------------|----|-------|--------|---------------|
| <b>*OCH<sub>3</sub></b> | Sc | 1.087 | -0.188 | 0.086         |
|                         | Ti | 1.093 | -0.159 | 0.078         |
|                         | V  | 1.079 | -0.185 | 0.086         |
|                         | Cr | 1.065 | -0.199 | 0.091         |
|                         | Mn | 1.059 | -0.204 | 0.092         |
|                         | Cu | 1.059 | -0.141 | 0.066         |
|                         | Zn | 1.081 | -0.233 | 0.106         |
|                         | Y  | 1.080 | -0.128 | 0.064         |
|                         | Zr | 1.094 | -0.171 | 0.083         |
|                         | Nb | 1.084 | -0.163 | 0.081         |
|                         | Ag | 1.070 | -0.192 | 0.098         |
|                         | Cd | 1.070 | -0.166 | 0.082         |
|                         | Hf | 1.100 | -0.111 | 0.058         |

| <b>Intermediate</b> | <b>TM</b> | <b>ZPE</b> | <b>-TS</b> | $\int C_p dT$ |
|---------------------|-----------|------------|------------|---------------|
| <b>*O</b>           | Sc        | 0.081      | -0.045     | 0.028         |
|                     | Ti        | 0.082      | -0.055     | 0.031         |
|                     | V         | 0.079      | -0.066     | 0.034         |
|                     | Cr        | 0.062      | -0.096     | 0.043         |
|                     | Mn        | 0.052      | -0.053     | 0.023         |
|                     | Cu        | 0.038      | -0.005     | 0.004         |
|                     | Zn        | 0.051      | -0.096     | 0.044         |
|                     | Y         | 0.063      | -0.070     | 0.037         |
|                     | Zr        | 0.078      | -0.053     | 0.031         |
|                     | Nb        | 0.082      | -0.052     | 0.030         |
|                     | Ag        | 0.041      | -0.104     | 0.047         |
|                     | Cd        | 0.099      | -0.026     | 0.018         |
|                     | Hf        | 0.084      | -0.051     | 0.030         |

| <b>Intermediate</b> | <b>TM</b> | <b>ZPE</b> | <b>-TS</b> | $\int C_p dT$ |
|---------------------|-----------|------------|------------|---------------|
| <b>*OH</b>          | Sc        | 0.309      | -0.109     | 0.056         |
|                     | Ti        | 0.342      | -0.107     | 0.056         |
|                     | V         | 0.340      | -0.113     | 0.058         |
|                     | Cr        | 0.343      | -0.101     | 0.056         |
|                     | Mn        | 0.328      | -0.126     | 0.065         |
|                     | Cu        | 0.338      | -0.130     | 0.063         |
|                     | Zn        | 0.343      | -0.066     | 0.037         |
|                     | Y         | 0.326      | -0.126     | 0.067         |
|                     | Zr        | 0.334      | -0.101     | 0.058         |
|                     | Nb        | 0.332      | -0.122     | 0.062         |
|                     | Ag        | 0.337      | -0.118     | 0.061         |
|                     | Cd        | 0.332      | -0.138     | 0.066         |
|                     | Hf        | 0.332      | -0.116     | 0.064         |

**Table S5.** Bader charge transfer ( $|e|$ ) of TM metals with different intermediates

|           | TM-g-C <sub>3</sub> N <sub>4</sub> | *OCHO | *COOH | *CO   | *CHO  | *OCH <sub>2</sub> | *OCH <sub>3</sub> | *O    | *OH   |
|-----------|------------------------------------|-------|-------|-------|-------|-------------------|-------------------|-------|-------|
| <b>Cr</b> | 1.405                              | 1.437 | 1.405 | 1.379 | 1.415 | 1.442             | 1.468             | 1.646 | 1.440 |
| <b>Cd</b> | 1.351                              | 1.288 | 1.071 | 1.301 | 1.008 | 1.320             | 1.254             | 1.335 | 1.242 |
| <b>Nb</b> | 1.563                              | 2.167 | 1.993 | 1.925 | 1.948 | 2.273             | 2.316             | 2.551 | 2.294 |
| <b>Zr</b> | 1.873                              | 2.691 | 2.491 | 2.299 | 2.416 | 2.578             | 2.623             | 2.474 | 2.621 |
| <b>Hf</b> | 1.891                              | 2.711 | 2.526 | 2.409 | 2.461 | 2.611             | 2.622             | 2.417 | 2.599 |
